# Supplementary material for: YAP/TAZ deficiency reprograms macrophage phenotype and improves infarct healing and cardiac function after myocardial infarction
Source: PubMed Central journal article supplement (PMC7735680; doi:10.1371/journal.pbio.3000941), 2020-12-02

**A**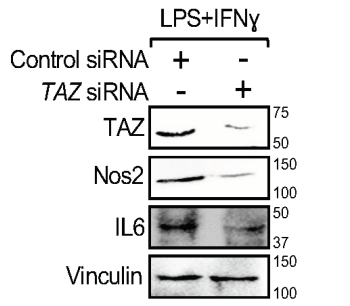

□ Control siRNA+ LPS/IFN $\gamma$   
 ■ TAZ siRNA+ LPS/IFN $\gamma$

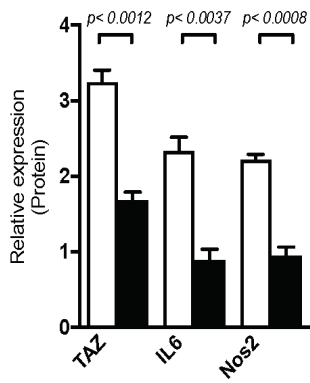**B**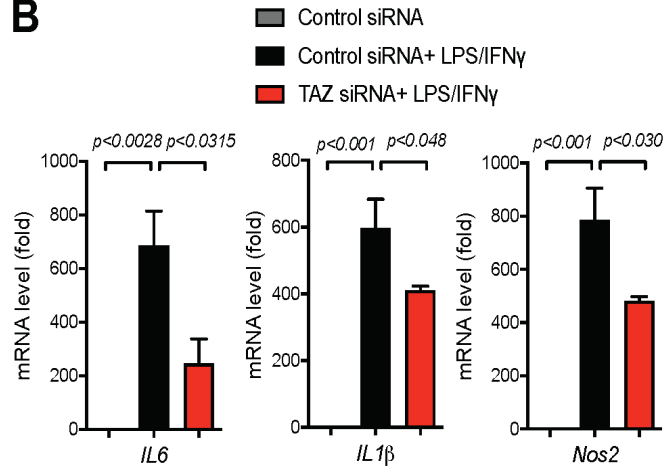**C**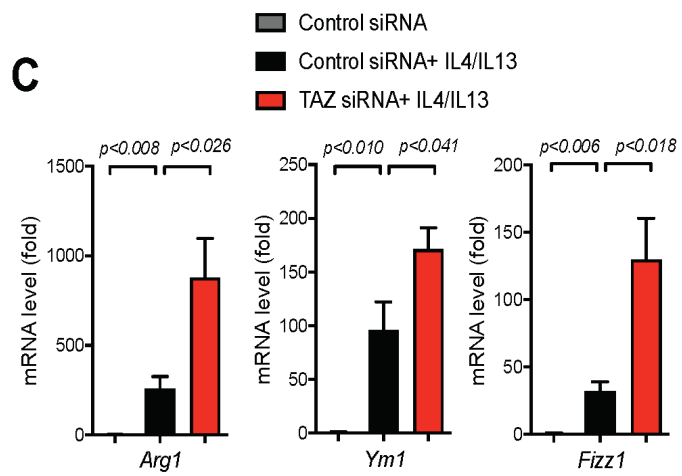**D**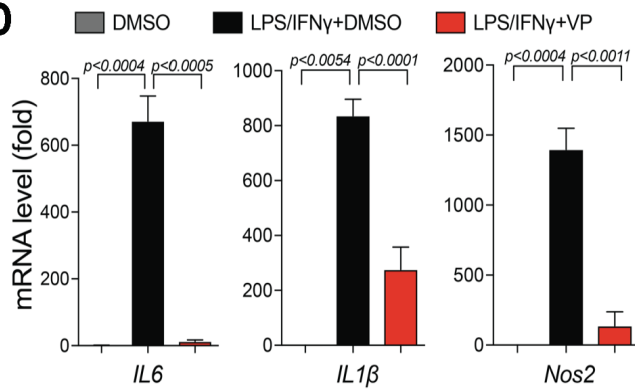

Supplement: pbio.3000941.s003.pdf [file pbio.3000941.s003.pdf]
