# Supplementary material for: YAP/TAZ deficiency reprograms macrophage phenotype and improves infarct healing and cardiac function after myocardial infarction
Source: PubMed Central journal article supplement (PMC7735680; doi:10.1371/journal.pbio.3000941), 2020-12-02
Supplement: pbio.3000941.s011.pdf [file pbio.3000941.s011.pdf]

**A**

TGGAATG  
 AAGCATG  
 AAGTATG  
 TAGAATG  
 GGAATG  
 TGAATG

Reported Tead binding sites

**B**

### Reported Tead binding sites in *Arg1* promoter (3100bp promoter + exon1)

CTCTCAGAACCATACAGCAAGGAGAACCTCCTCAGGGCCATG**GTATG**TGTTTCCCAACA  
 CGGACACACACACAATCACACAGAGTAAAGGGTTTTTAATTAAGCAAGAAATACAGTTT  
 ACACATATGCTGCATAAGGTCACGGAGGGTGGTAGCCGACGAGAGACCAGCTCATCTTC  
 AATAAGGAAGTCAGAGAGCAGAAAGCCTTTGTCAGCAGGGCAAGACTATACTTTGTTAGGA  
 AGTGAGGCATTGTTTCCAGACTTCCTTATGCTTTCTTATGAACAGGCCTGTATTAGCCAACAG  
 TCCTGTCTGTACGTGAGTTGTGCCACTTTGGGTTGAGGGTGTGGGCTAACACAGATCTT  
 AGTTAAGCATTTCCTTGTCTTTGATTCCTCAATGACCCAGAACAGGCAACAATACGAT  
 ACTTATGTTTATGAAATTAGATGACTGCATCTACAACCTGGACTTGTGACTGAGTTCTGG  
 ATGGTCGCCTGAAGGAGACCGCAGGGAGGCAGGGGATACTTTAATAGGACTGACTGTGAG  
 GGTAAATCGGTGTCTATACATGGAACCGTCTGT**GTATG**GAGATACCCAGAACAAATAAAGA  
 CCCAAGAAAAACAGATAGTCAAGAAATCATGAGTTTTACTTTAATCAGGGCGTTTTGATCA  
 GTCAGTCCAATGATGCCAATGATGAAAAGTCAACCTCAAACCTGCCCGAGGGAAGACTTTC  
 AGGAAAAGCCCTGGTGATAAAGTTTAAACAGCAAATACCTA**TGAATG**AATGTATAAAGCTA  
 GTAACGGCCGTAGCACTGTTTTCAAACCTAGTACCCGGCTCACTTACATTTGCGAGAC  
 CCCGACAGAAGTAAATGTAAGGTCAAGCGATTTTGAAAAGAGGAGCACCAAGTTCCCTTC  
 CTGAAGCTCTAACGTCCTCCGGAAGCCCTACCAATGAGGCT**GCATG**GATTTGGTGCAGCCA  
 CAGGTGATGAGCCAGGGCATAGAGGAAAAC**TGGAAGATGGAGCAGCATATCGTTTATAAC**  
 AGCAACTTGGCATCTGATGGAGATAGCTCAGTGGTAACGTGGGGAGTCTGTCCATTTGGT  
 GCTGGTGGGAAACTGGGAGAGACAAGGGGAAATGGAGGATTTAAACAAAATACAAAAA  
 AAAAAAATGACGCAACAGTCAAGCAATCACTGTGAATAGCAAAATCTTTCATGATCCAA  
 GACTTAAGCCAGCATCTTTCAGGCAGGAAAACAATCTACCC**TGAATG**GCATTTTTCTT  
 CTTTTCTTTTACCTTTGGGGCAGGTTCTGTGTTGACCTTTGAACCTAACCTATAACCC  
 AGCAGGTGTTGAACCTATAATCCCTCGCTCATCTCTCAATAGCTGGAATTTGTGGG  
 CCAGCACAAGAGGCCAAAGAAAGAGAAAGTTTAAATTAATAGAAAGAAATGTAGAGG  
 TATTGACAGGTGGTGGTATCACACACCTTTAATCCAGCACCTCAGAGGCGAGTGACAGAT  
 TGCTATCTGTGAGTTCAAGGTTAGCCTGGTCTATAGGGCTAGTTC**TAGGGTAGCCAGAGC**  
 CACACAAGAAACATGCTCCAAAAGCAACAAAATGTAGAGTGCACATTTGGGAT  
 CTGGGAGCAGGTAACAACTTAAATTCCTAGCTAGCTTCAAATATATAGGAAAATCTATCT  
 TACATAAATCAATTTTTTAAAAAATCTATAACCGTATATCAGAAAAACATAGTAAGATG  
 AAAAAATATTTGAAAAGGAGGTATCAAAATGGTCTGAGGACTTTGGCTCTCTGATTT  
 ATTCATTCAAATAATGCAATACATTTATTCATCAATAAGTCAATGTTTATTTTGTACTG  
 ACGATTCTATGTACTGATGGTAGAGGGAACAGAATCTTCTT**GAGGTATAAAATCTG**  
 GGTGCTTTTTGCTCACAAGGTTAAAGAAATTTACTTCTGACATGTGGGTTTTCTTTTT  
 AAAATTTAATCATGTAACCTTTGTAACCTGGGAGAACTTGGTGTGTTTCTTCTAAAT  
 AATACTTTAAAAATATTCTTTAGTGTGGGGGTGGCTTTACACAGGGACCGGACCACA  
 TCACCCAGTGGAGGTCAGAGATCAACTTGGAGGAGTTGACTTTTCTTGCACCAATG  
 GGTCTTCGGGTCAAACCTCGGGTCATCGGGCTTGGTGTACCAGGCTGGCCTCTCTCATCT  
 GCCCTAGATCTCAGGGGGCCCTGCTGACACTCTGCTGGTGTGTAGATTAGAATCGCGGA  
 GCTCGGCGGGTGC**AGAATG**CCCATTTGCTCCGTTTCGATTTCTTGCACCT**GTATG**TGAC  
 TAGCAACCTCACCAGCTGCAGTCTCTTCTGGGCAAAACAGCAT**AGAATG**GATTTCTCAG  
 TCTGAAGTTAGTTTAAAGAGGAACAGGAAGCGAAAGAACATTAAC**TAGAATAGCACTG**  
 GCACACGACAAAGACAACCTCATATTAGCTAGTTTGCTTTCCCTATCTTGGGATATCATGA  
 TTCCAAAATGAGATTTTCTGGAGACTGTATTTCAAATAAGAACTGCTTTGGGTTGTC  
 AGGAAATAAATGATGCCCTTCTGTAATAATAATAATAATAACAACAACAATATAA  
 AACAAAACCCAGCCCATGCTTTCTTAGACAGTGAACCTGGTGAACATGAAATGTGTC  
 TCACTTTCCCCAGAACTTGAAGCCTTGACTCAGGATGCTCAACAGGAGGGAAGTAAGAGA  
 CACCCCCCAACCCCTCACCCCCCACTTGTGTTTTAGCCTCACCTT**GCAAGT**  
 CCCCAGTGGACTTAAATCCTGGAAAAGGTGAGCACCCCTGCCCTGAGGTGCCAGGCGGGA  
 AGCCTAGCACTTACATGAGGTTATGAAATCACACATAATTGCAATTGCTGAGGAGAG  
 ATTAATGTCTCAGCTGGCTTTTTCAAAGGGTGTGAACCTGGACGGATGAATAATGCTC  
 AGAGGGA**AGAATG**GTAGTTCCCTCTGATGGGAGGTTCTGTTGACTCTGTCAATTTCCAT  
 TCGGTGGGCGGAGCCAGTTGTTGGATAAACAGATCCAAC**TGATTATAAGGGGGAAAAA**  
**GATGTGCCCTCTGTCTTTTAGGGTTACGGCCGGTGGAGAGGAGCTGGACAGCCCGAGCAC**  
**ATGCAGCAGCAGCAGCCGCTGGAACCCAGAGAGCATGAGCTCCAAGCCAAAGTCTCTTA**  
**GAGATTATCGGAGCCCTTCTCAAAGGACAG**GTGAGTTTGCTT**TGAATG**ACTGGAAAT
