# Supplementary material for: YAP/TAZ deficiency reprograms macrophage phenotype and improves infarct healing and cardiac function after myocardial infarction
Source: PubMed Central journal article supplement (PMC7735680; doi:10.1371/journal.pbio.3000941), 2020-12-02

● Control  
 ■ Yap/Taz dKO

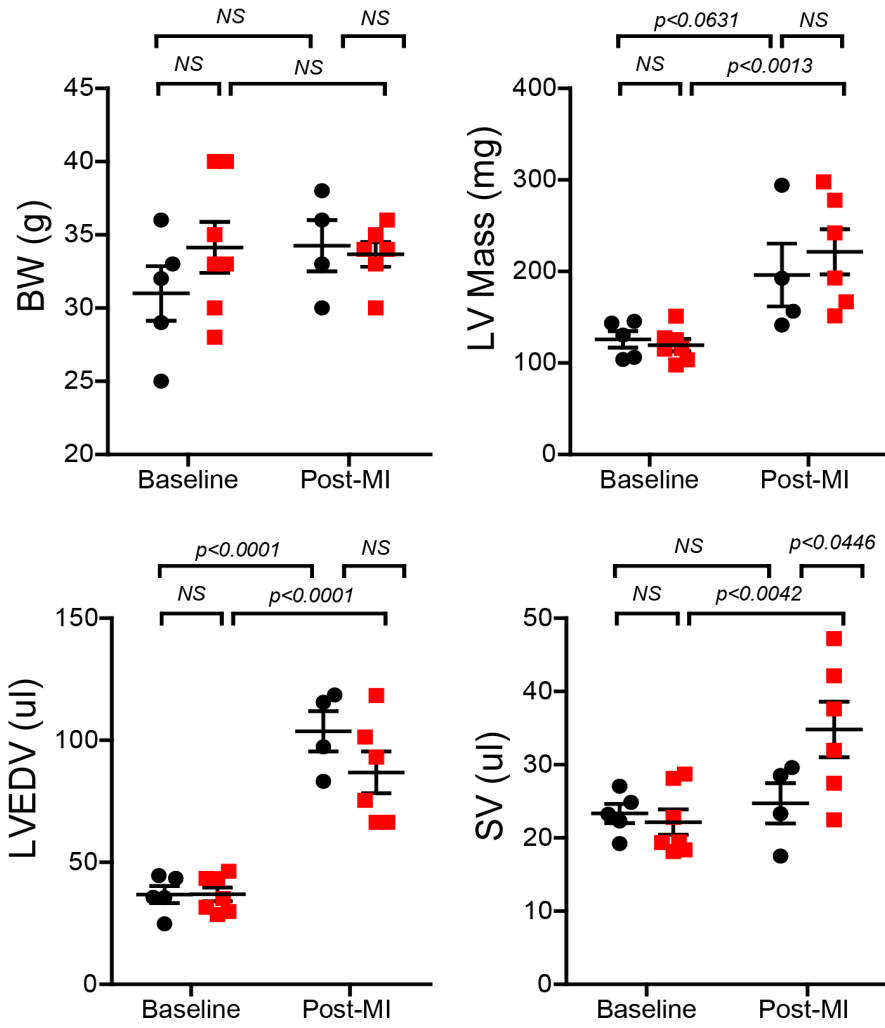

Supplement: pbio.3000941.s014.pdf [file pbio.3000941.s014.pdf]
