# Supplementary material for: YAP/TAZ deficiency reprograms macrophage phenotype and improves infarct healing and cardiac function after myocardial infarction
Source: PubMed Central journal article supplement (PMC7735680; doi:10.1371/journal.pbio.3000941), 2020-12-02
Supplement: pbio.3000941.s020.pdf [file pbio.3000941.s020.pdf]

BD FACSDiva 9.0.1

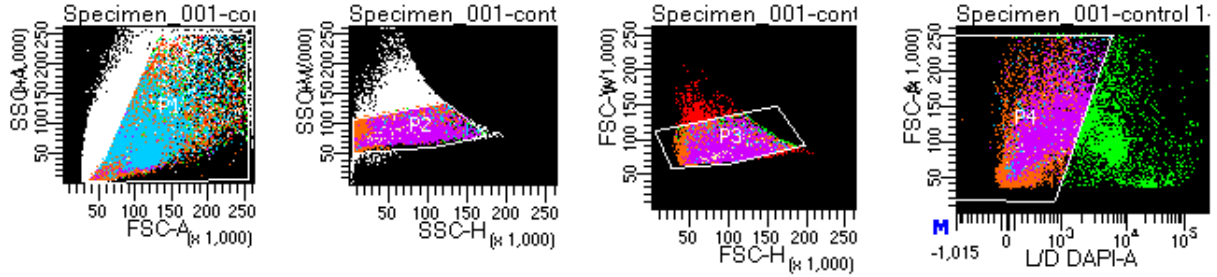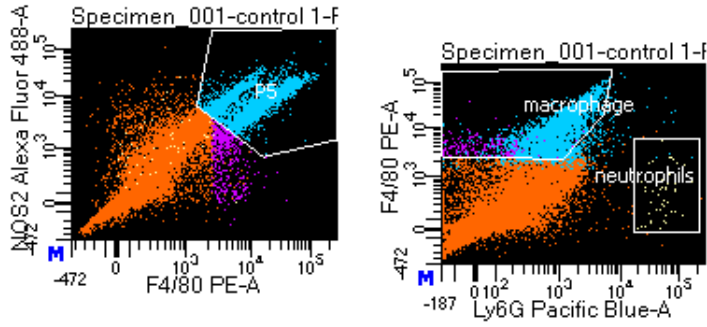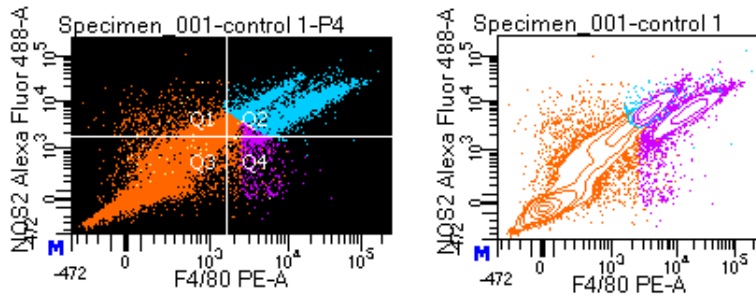

Tube: control 1

| Population  | #Events | %Parent | %Total |
|-------------|---------|---------|--------|
| All Events  | 50,000  | ####    | 100.0  |
| P1          | 26,765  | 53.5    | 53.5   |
| P2          | 22,579  | 84.4    | 45.2   |
| P3          | 21,920  | 97.1    | 43.8   |
| P4          | 19,668  | 89.7    | 39.3   |
| P5          | 3,237   | 16.5    | 6.5    |
| macrophage  | 3,255   | 16.5    | 6.5    |
| neutrophils | 51      | 0.3     | 0.1    |
| Q1          | 1,400   | 7.1     | 2.8    |
| Q2          | 3,715   | 18.9    | 7.4    |
| Q3          | 14,024  | 71.3    | 28.0   |
| Q4          | 529     | 2.7     | 1.1    |
