# Supplementary material for: YAP/TAZ deficiency reprograms macrophage phenotype and improves infarct healing and cardiac function after myocardial infarction
Source: PubMed Central journal article supplement (PMC7735680; doi:10.1371/journal.pbio.3000941), 2020-12-02
Supplement: pbio.3000941.s021.pdf [file pbio.3000941.s021.pdf]

BD FACSDiva 9.0.1

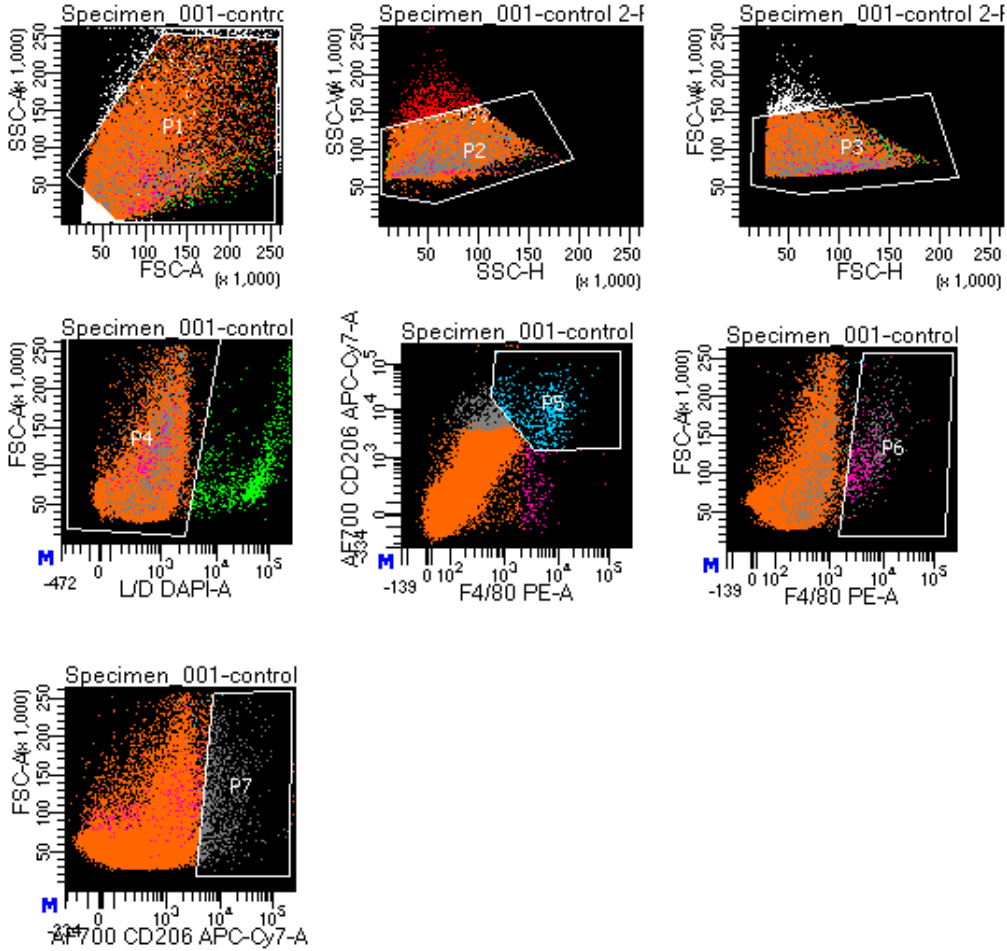

Tube: control 2

| Population | #Events | %Parent | %Total |
|------------|---------|---------|--------|
| All Events | 50,000  | ####    | 100.0  |
| P1         | 33,992  | 68.0    | 68.0   |
| P2         | 33,451  | 98.4    | 66.9   |
| P3         | 33,050  | 98.8    | 66.1   |
| P4         | 32,292  | 97.7    | 64.6   |
| P5         | 473     | 1.5     | 0.9    |
| P6         | 523     | 1.6     | 1.0    |
| P7         | 801     | 2.5     | 1.6    |
